# Supplementary material
Source: PubMed Central journal article supplement (PMC3561780)
Supplement: NIHMS356220-supplement-03.pdf [file NIHMS356220-supplement-03.pdf]

# Patatin-like domain (PLD)

GCGFLG conserved domain      GASAG conserved domain

*Glossina morsitans morsitans*  
*Drosophila melanogaster*  
*Culex quinquefasciatus*  
*Aedes aegypti*  
*Anopheles gambiae*

```
M-----NLSFAGCGFLGIYHVGVAVCFKKYAPHLLE-K-IGGASAGALAACCLLCDLPLGSMSTDFFRVVNEARRHSLGPFSPSENIQTCLLEGLQK
M-----NLSFAGCGFLGIYHVGVAVCFKKYAPHLLE-K-IGGASAGSLAACCLLCDLPLGSMSTDFFRVVNEARRYSLGPFSPSENIQTCLLEGLQK
M-----NLSFAGCGFLGIYHVGVAVCFKKYAPHLLEH-R-ISGASAGSLAACCLLCDMPLGEMTSDFFRVVNEARRSHSLGPFSPSENIQTCLLEGLQK
M-----NLSFAGCGFLGIYHVGVAVAFKKYAPHLLEH-R-ISGASAGALAACCLLCDMPLGEMTSDFFRVVNEARRSHSLGPFSPSENIQTCLLEGLQK
MA--TKM-NLSFAGCGFLGIYHVGVAVCFKKYAPHLLEH-R-ISGASAGALAACCLLCDMPLGEMTSDFFRVVNEARRSHSLGPFSPSENIQTCLLEGLQK
```

*Glossina morsitans morsitans*  
*Drosophila melanogaster*  
*Culex quinquefasciatus*  
*Aedes aegypti*  
*Anopheles gambiae*

```
HLPEDAHRVSGRLHISMTRVYDGKNVIVSEFNSRDELLQALLCACFIPGFSGILPPREFGVRYMDGAFSDNLPITLD-ENTITVSPFCGESDICPRDQSS
HLPDDAHRVNGRLHISLTRVYDGKNVILSEFESREEVLLQALLCACFIPGFSGILPPREFGVRYMDGAFSDNLPITLD-ENTITVSPFCGESDICPRDQSS
FLPDDAHERVNGKLHISLTRVYDGKNVIVSQFNSREDLLQALLCACFIPVFSGLLPPREFGVRYMDGAFSDNLPITLD-ENTVTVSPFCGESDICPRDNSS
FLPDDAHERVNGKLHISLTRVYDGKNVIVSQFNSREDLLQALLCACFIPVFSGLLPPREFGVRYMDGAFSDNLPITLD-ENTVTVSPFCGESDICPRDNSS
FLPADAHERVNGKLHISLTRVYDGKNVIVSQFHSREDLLQALLCACFIPVFSGLLPPREFGVRYMDGAFSDNLPITLD-ENTVTVSPFCGESDICPRDNSS
```

*Glossina morsitans morsitans*  
*Drosophila melanogaster*  
*Culex quinquefasciatus*  
*Aedes aegypti*  
*Anopheles gambiae*

```
QLF--HLNWNANTSIEISRONINREVRILFPPRPEFLSKFCQQGFDDALQFLHRNNLINCRRCVAVQSTFVNSE---TVAQP--Q-DFDPECRECK---
QLF--HLNWNANTSIEISRONINREVRILFPPRPEFLSKFCQQGFDDALQFLHRNNLINCRRCVAVQSTFVNSE---TVAQP--Q-DFDPECRECK---
QMF--HVNWNANTSIELSKQNMNREGRILFPPRPEILSSFCQQGFDDALNFLHRNNLISCTR-CLSVQSTFSLADQPT-OLEDQLE- EYDPECSECKE CN
QMF--HVNWNANTSIELSKENINREGRILFPPKPEILSSFCQQGFDDALNFLHRNNLISCTR-CLAVQSTFVVAEQPSSSLEEKILE- EYDPECSECKE CT
QMF--HVNWNANTSIELSKQNMNREGRILFPPRPEILSSFCQQGFDDALNFLHRNNLISCTR-CLSVQSTFCVSEQPK-OLEEQLE- EYDPECSECKDCN
```

*Glossina morsitans morsitans*  
*Drosophila melanogaster*  
*Culex quinquefasciatus*  
*Aedes aegypti*  
*Anopheles gambiae*

```
KHRKDALSSN-MP--QTVLDVIQDYIEQANKGLANWLFKHRGKLL--SLPATVPMDFLMATVN-----
KHRKDALSSN-MP--QTVLDVIQDYIEQANKGLANWLFKHRGKLL--SLPATVPMDFLLATIS-----
EHRONALDGS-MP--DTVLTVFQTYIEEANKGLMNWVFRHRGARLLKALSPLATLPADIMVATL-----
QHRKNALVGS-MP--DNVLTVFQTYIEQANKGLINWVFRHRGKLLTALSPLATLPADIVCATL-----
EHRONALDGS-MP--DTVLTVFQTAVDQANKGLMNWVFKHRGARLLKALSPLATLPADIVCATLTNGVGTDIERRQFYKVLGNIICPATSSSTEPMNPS
```

*Glossina morsitans morsitans*  
*Drosophila melanogaster*  
*Culex quinquefasciatus*  
*Aedes aegypti*  
*Anopheles gambiae*

```
-----KVTTVTPRLTKQMRRLVEELINQFNRRVQVHLFNKFTICDPPHFDTTGLLHSKRLYG
-----KISALTPKLTQARVMVEDLILQLNHAMRIRLLNKFTLYDQPHFDATGLLHSSRLYG
-----SK
-----TK
CQKCLARRLRALSSSGSTVQIRLNDQEARELVPMVRSLETRLKRLMVAIPTIGSGLWSVSKFALKTLNAMLIRVRRGQQ-----
```

*Glossina morsitans morsitans*  
*Drosophila melanogaster*  
*Culex quinquefasciatus*  
*Aedes aegypti*  
*Anopheles gambiae*

```
PRVSILV-----DECGAPPLEDDVDHYEHVVKVIT
PRVSILV-----DECGATPLEDDVDNFEHVKMIT
-----
--IAAKIQCTMAYTEYTTGQGAQLVSR--RVSTRAAGGSLLDVRVD-NGSDLVAV-----VTHGEHD---RNRG---EGGED-HPDYDTFDNVLQATS
```

*Glossina morsitans morsitans*  
*Drosophila melanogaster*  
*Culex quinquefasciatus*  
*Aedes aegypti*  
*Anopheles gambiae*

```
HNDALYAYYYTDD-H-TNKVKVTEIFD-----MTENIELATDLKQYEGSIEDHPNPHQ-HHHNA
HNDALYAYYYTDS-N-TNKVKVTEIFDFDE-----ITEHDKLATDLQIYEGSVEDHPNPHQ-HSHNT
-----
HHDSMYAYFYMD--D-NQKVKVTEIFDMDTDDGNPALQTAQERELNQQLEFDNDDWESTATTQPDFLYADSYHSGDEMIDLDELIADPCLYLNSNHQNF
```

*Glossina morsitans morsitans*  
*Drosophila melanogaster*  
*Culex quinquefasciatus*  
*Aedes aegypti*  
*Anopheles gambiae*

```
VLSEWNGIESDFFIDRQTATSTAHSITDSKISHTVSTVYTTYKIEPDSRTAPSSSEEDNCPFSSEADHYNESDRNEIPRHHYKHDLTIVSTQQDSIV
VVSEWNGVES-----VQVMPTT-----PE-----L-----H-----
-----
HYHQQQFRHHHHHQQLTDGCLQTHHHHVQIEELPAD--DAYLQ-----PEADQQALLSEAAARLLGKA-----
```

*Glossina morsitans morsitans*  
*Drosophila melanogaster*  
*Culex quinquefasciatus*  
*Aedes aegypti*  
*Anopheles gambiae*

```
PNELCIDIE-
-----DVAF
-----
-----
PASAYSIVEM
```

Conserved region

Variable region
