# Supplementary material
Source: PubMed Central journal article supplement (PMC3561780)
Supplement: NIHMS356220-supplement-06.pdf [file NIHMS356220-supplement-06.pdf]

|                      | Thorax |                                                                                   | Abdomen                                                                            |   |                                                                                     |                                                                                     |
|----------------------|--------|-----------------------------------------------------------------------------------|------------------------------------------------------------------------------------|---|-------------------------------------------------------------------------------------|-------------------------------------------------------------------------------------|
| <b>Control</b>       | +      |  |  | + |  |  |
| <b>Ligated</b>       | +      |  |  | - |  |  |
| <b>HrTH injected</b> | +      |  |  | + |  |  |
|                      |        | <i>HrTH antisera</i>                                                              | <i>Apoll antisera</i>                                                              |   | <i>HrTH antisera</i>                                                                | <i>Apoll antisera</i>                                                               |
