# Supplementary material
Source: PubMed Central journal article supplement (PMC3561780)

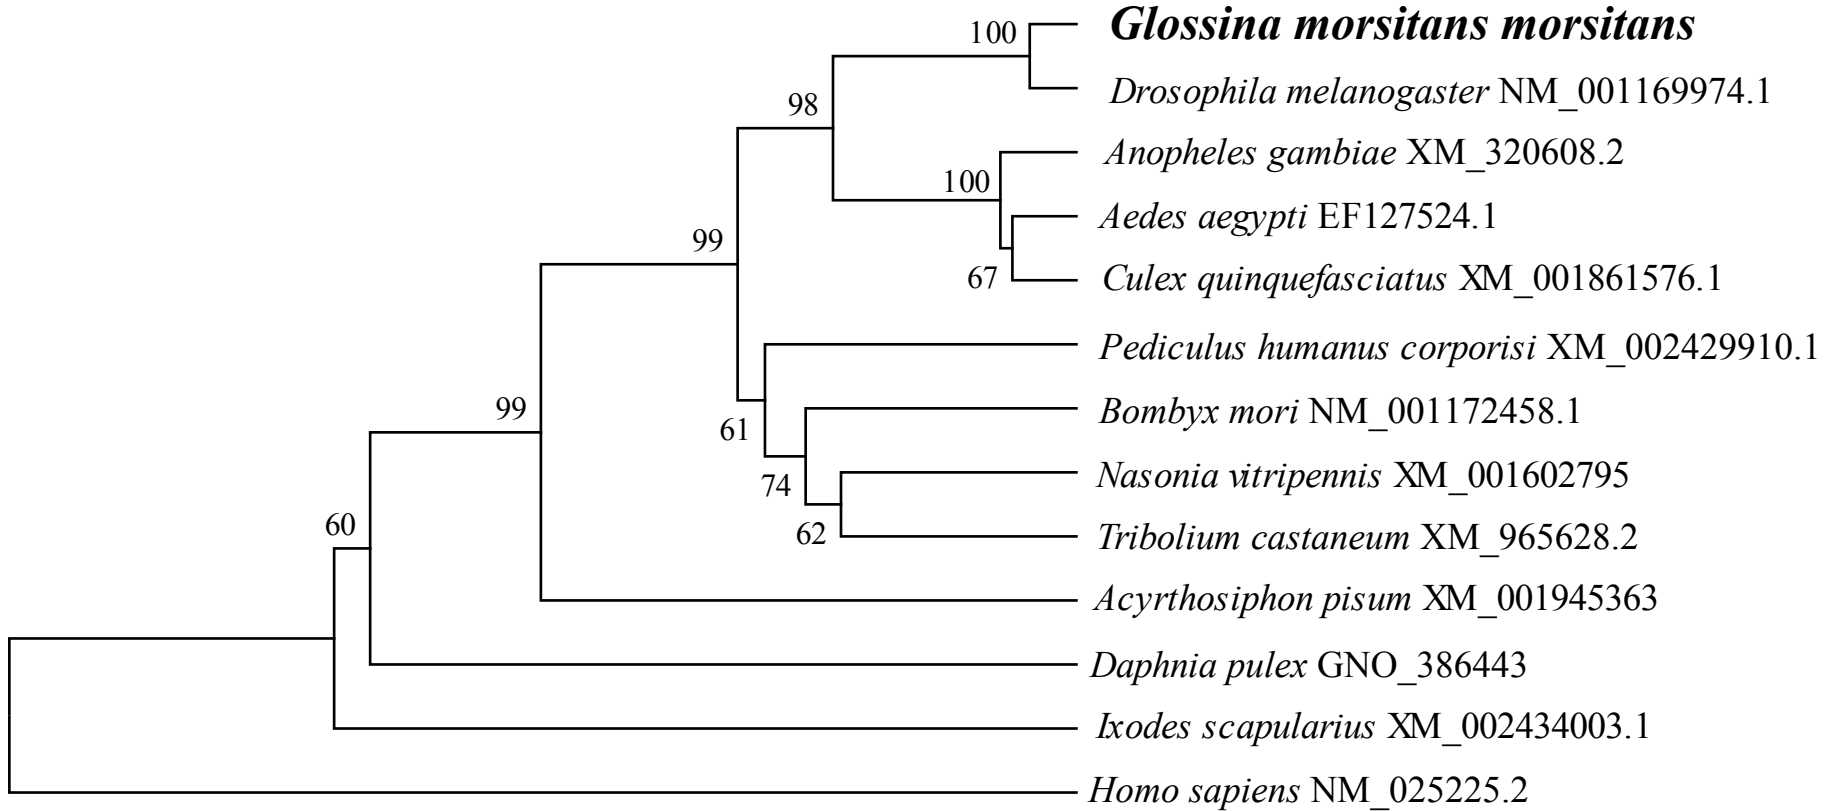

Supplement: NIHMS356220-supplement-04.pdf [file NIHMS356220-supplement-04.pdf]

Supplemental Figure 5

A.

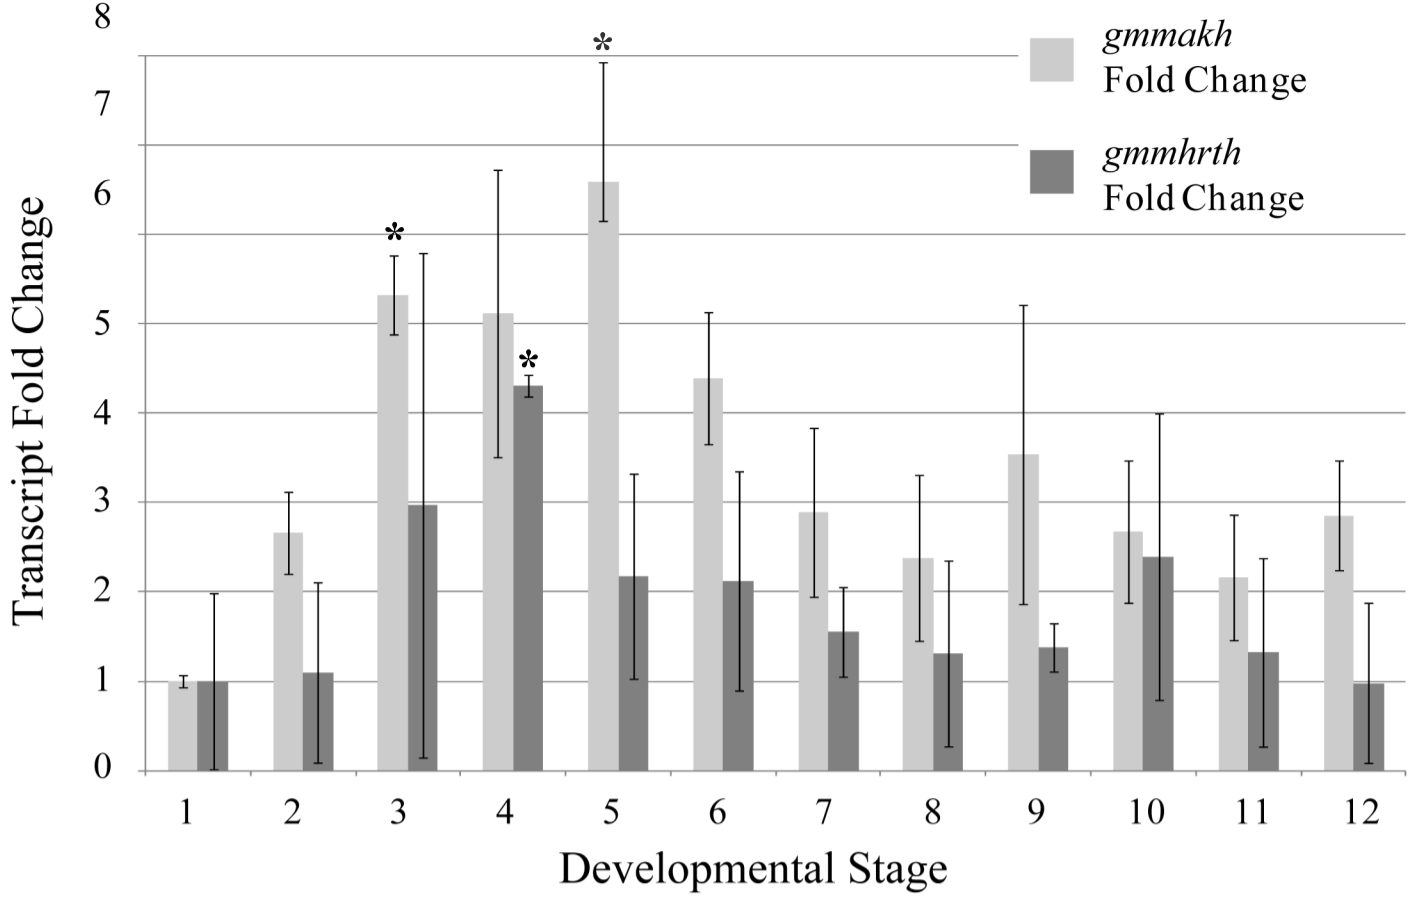

B.

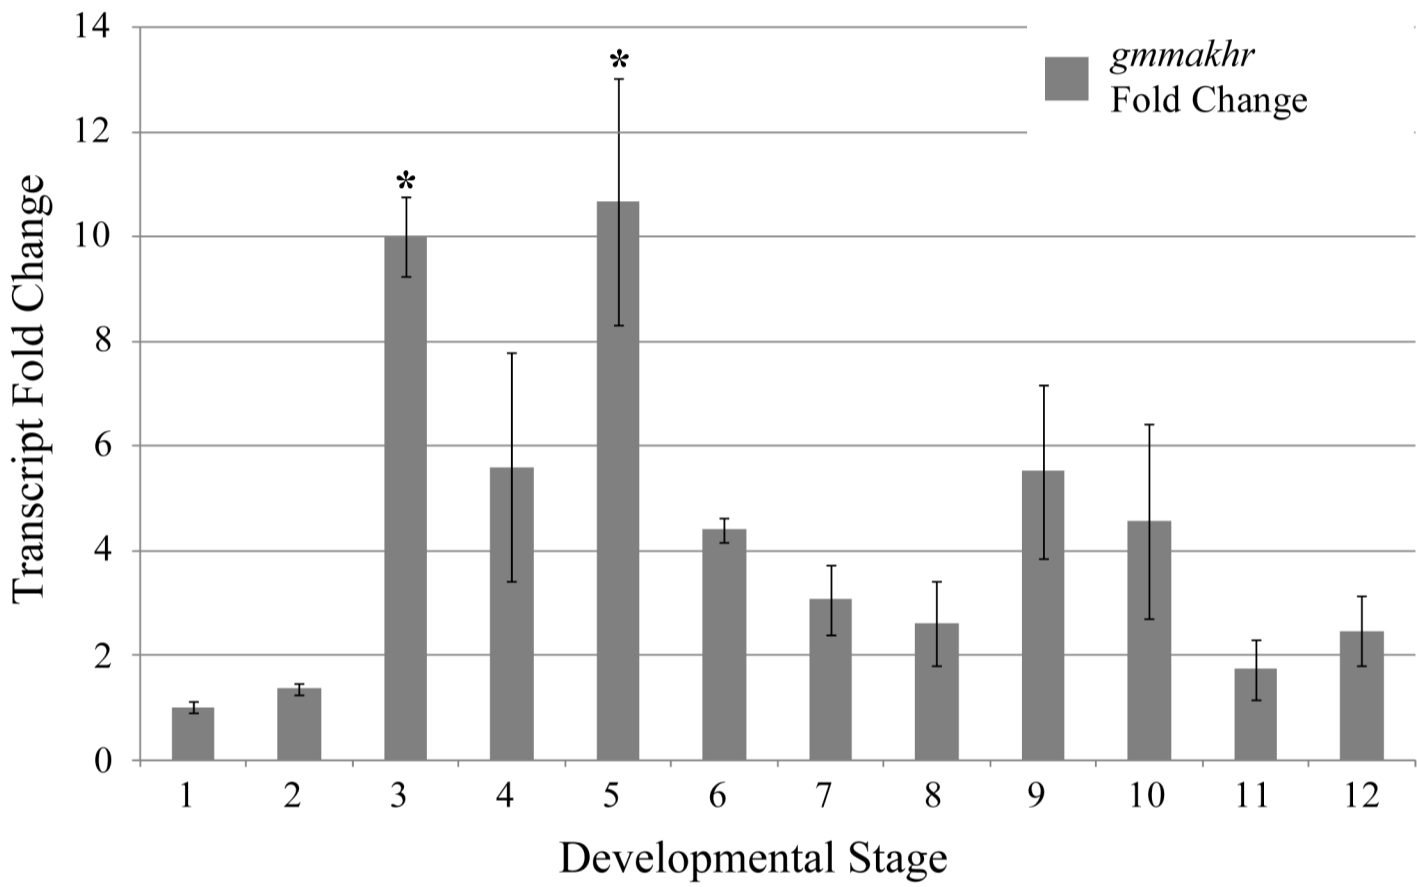

C.

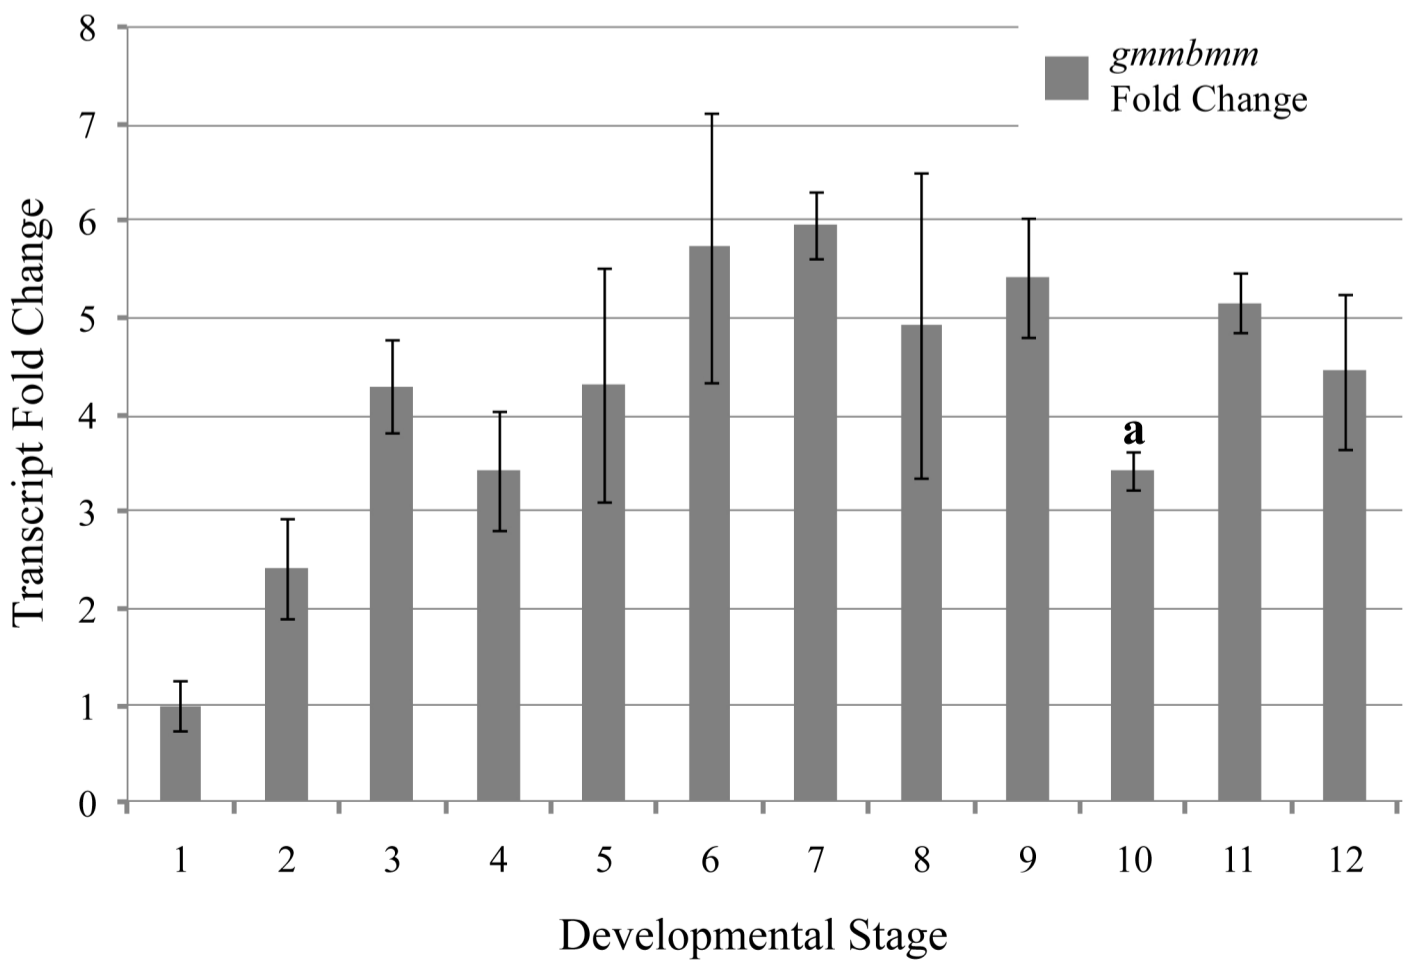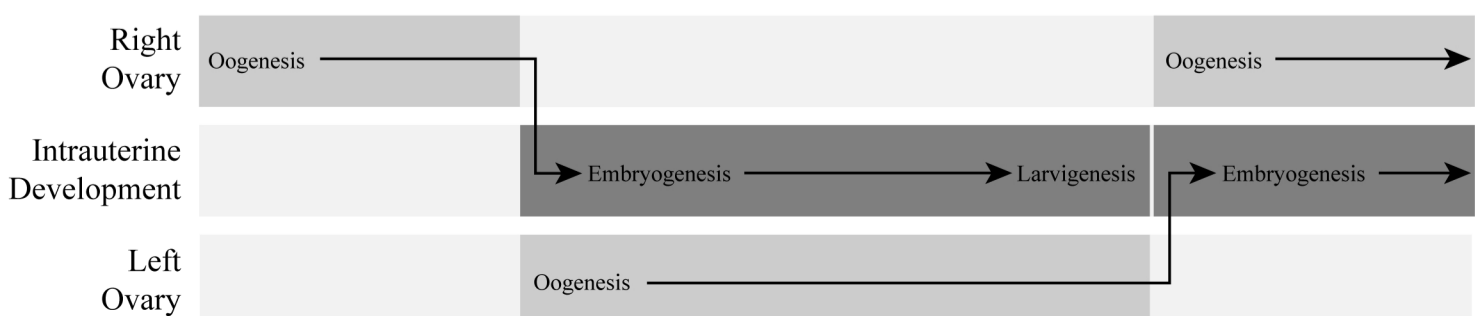

Supplement: NIHMS356220-supplement-05.pdf [file NIHMS356220-supplement-05.pdf]

A.

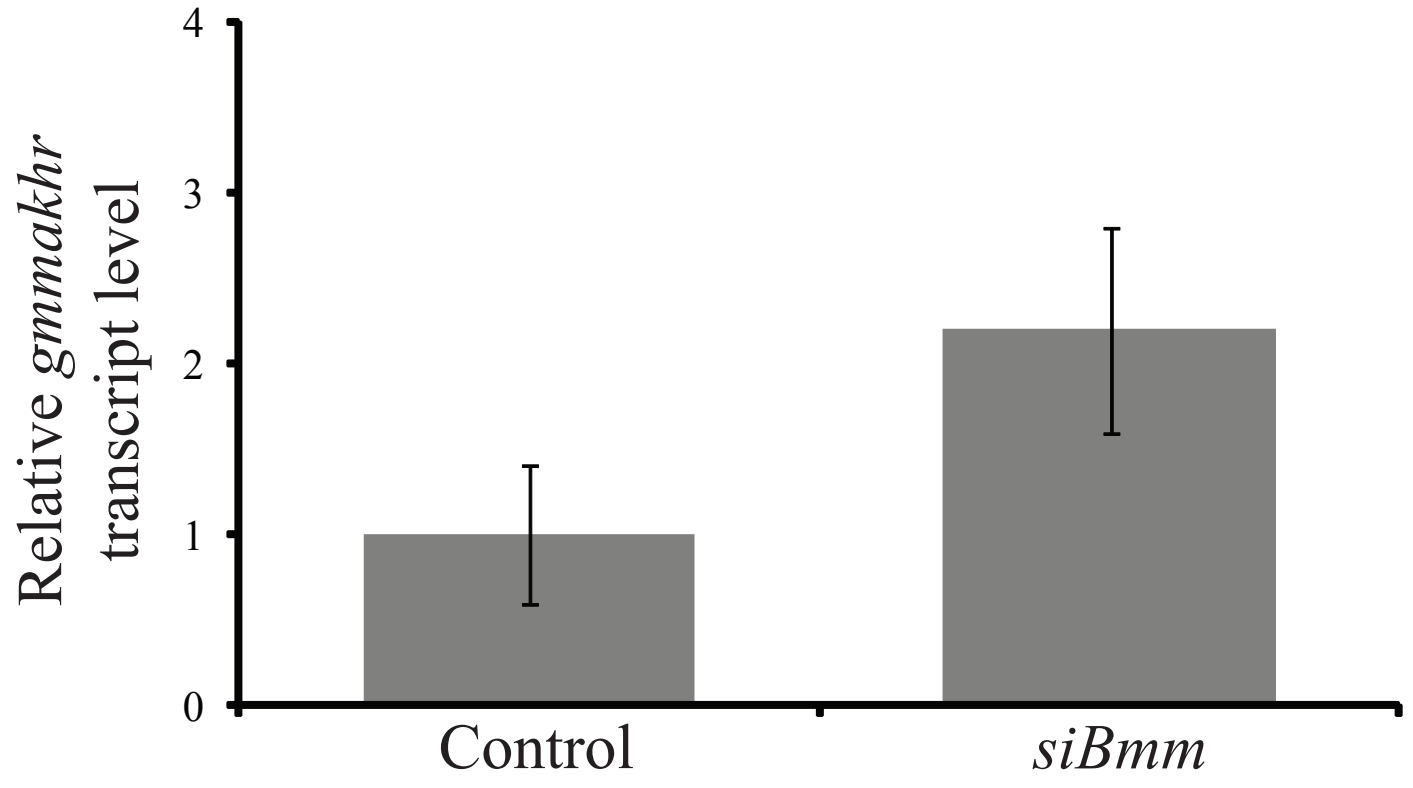

B.

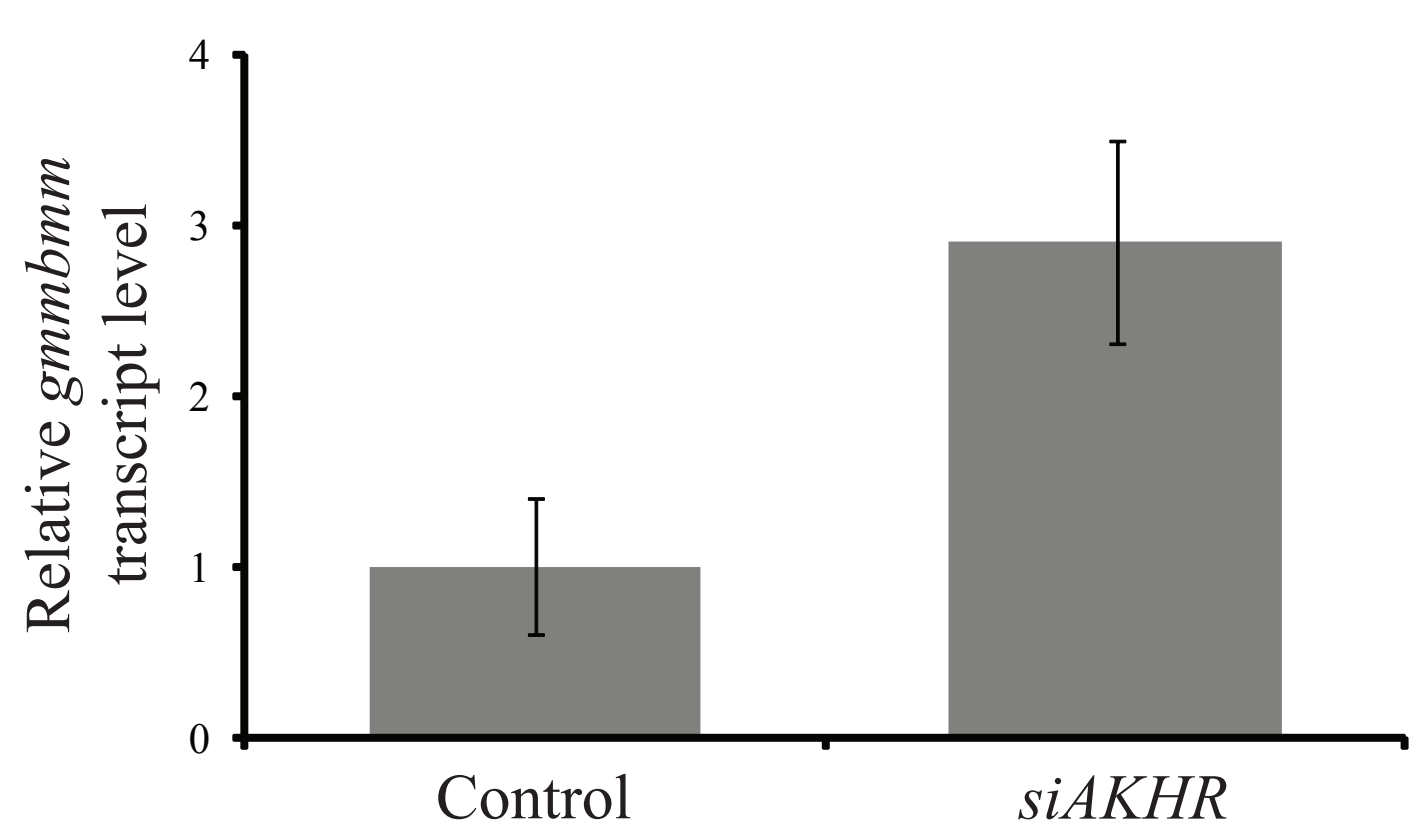

C.

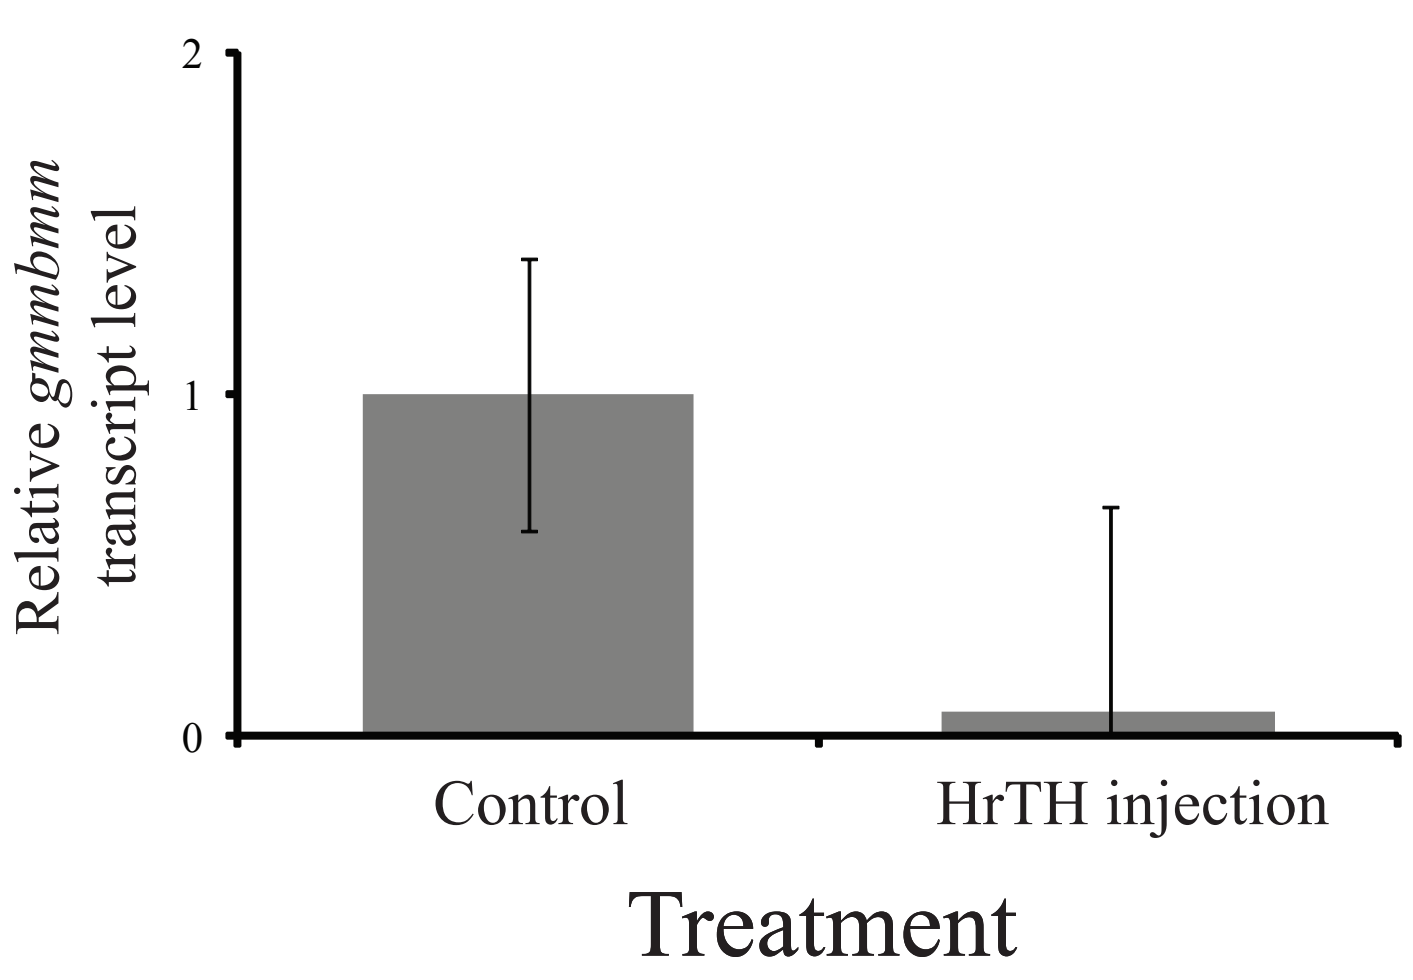

Supplement: NIHMS356220-supplement-07.pdf [file NIHMS356220-supplement-07.pdf]
